# Supplementary material for: Factors Influencing Primary Care Utilization among Patients with Chronic Diseases under Integrated Health System Reforms: A Cross-Sectional Study in Fujian Province, China
Source: Research Square preprint supplement (doi:10.21203/rs.3.rs-8727183/v1), 2026-02-17
Supplement: Supplementary file 1 [file 6a9cdee4b22acb5a9bd90c28.docx]

**Supplementary Material S1:**

**Survey on Utilization of Primary Healthcare Services by Chronic Disease Patients**

**Dear Patient:**

We are conducting this survey to understand your experiences with chronic disease management in primary healthcare institutions. **Your feedback is invaluable** for improving service quality and informing policy reforms.

- **There are no right or wrong answers**
- **Your responses will not affect future healthcare services**
- **Anonymous participation**
- **Strict confidentiality guaranteed**

Thank you for your cooperation!

**1. Which chronic condition(s) have you been diagnosed with by a physician?** (Multiple selection)
① Hypertension
② Dyslipidemia
③ Diabetes mellitus
④ Cerebrovascular disease
⑤ Heart disease
⑥ Chronic obstructive pulmonary disease (COPD)
⑦ Chronic pharyngitis
⑧ Gastroenteritis
⑨ Peptic ulcer
⑩ Cholelithiasis & cholecystitis
⑪ Intervertebral disc disease
⑫ Rheumatoid arthritis
⑬ Urinary calculi
⑭ Benign prostatic hyperplasia
⑮ Nephritis & nephrosis
⑯ Cataract
⑰ Anemia
⑱ Other: __________
⑲ No chronic conditions

**2. How would you rate your overall health status?**
① Excellent
② Good
③ Fair
④ Poor
⑤ Very poor

**3. Travel time to this healthcare institution (fastest route):**
① <10 minutes
② 11-20 minutes
③ 21-30 minutes
④ >30 minutes
⑤ Don’t know/Decline to answer

**4. When your chronic condition worsens, do you first visit primary healthcare institutions?**
① Never
② Sometimes
③ Often
④ Always
⑤ Don’t know/Decline to answer

**5. Average waiting time after registration:**
① >30 minutes
② 20-30 minutes
③ 10-20 minutes
④ <10 minutes
⑤ Don’t know/Decline to answer

**6. Perceived waiting time:**
① Very long
② Long
③ Moderate
④ Short
⑤ Don’t know/Decline to answer

**7. Usefulness of health guidance provided:**
① Not useful
② Neutral
③ Somewhat useful
④ Very useful
⑤ Don’t know/Decline to answer

**8. Effectiveness of clinical services received:**
① Not effective
② Neutral
③ Somewhat effective
④ Very effective
⑤ Don’t know/Decline to answer

**9. Can primary healthcare services meet most of your health needs (excluding acute/critical/complex conditions)?**
① No
② Partially
③ Mostly
④ Fully
⑤ Don’t know/Decline to answer

**10. Have you been referred (upward/downward) in the past year?**
① Yes
② No

**11. Did primary physicians assist in coordinating referrals (e.g., appointments)?**
① Never
② Sometimes
③ Often
④ Always
⑤ Don’t know/Decline to answer

**12. Mutual recognition of diagnostic results across institutions:**
① Never
② Sometimes
③ Often
④ Always
⑤ Don’t know/Decline to answer

**13. Access to specialist services at primary institutions (onsite/telemedicine):**
① Never
② Sometimes
③ Often
④ Always
⑤ Don’t know/Decline to answer

**14. Have you received government subsidies for primary care (e.g., waived fees, free medications)?**
① Never
② Minimal
③ Moderate
④ Substantial
⑤ Don’t know

**15. Are you satisfied with the government's subsidies?:**
① Very dissatisfied

② Dissatisfied
③ Satisfied
④ Very satisfied
⑤ Don’t know/Decline to answer

**Demographic Information**

**16. Gender:**
① Male
② Female

**17. Age:** ______ years

**18. Education level:**
① No formal education
② Primary school
③ Middle school
④ High school/vocational school
⑤ Technical secondary school
⑥ College
⑦ Bachelor’s degree or higher

**19. Average monthly household income:**
① <¥2,000
② ¥2,000-3,000
③ ¥3,000-4,000
④ ¥4,000-5,000
⑤ ¥5,000-8,000
⑥ ¥8,000-10,000
⑦ ¥10,000-20,000
⑧ >¥20,000
⑨ Don’t know/Decline to answer

**20. Primary health insurance type:**
① Public-funded
② Urban Employee Basic Medical Insurance
③ Urban-Rural Resident Basic Medical Insurance
④ Commercial insurance
⑤ Self-pay

**Thank you for your participation!**
