# Supplementary material for: Factors Influencing Primary Care Utilization among Patients with Chronic Diseases under Integrated Health System Reforms: A Cross-Sectional Study in Fujian Province, China
Source: Research Square preprint supplement (doi:10.21203/rs.3.rs-8727183/v1), 2026-02-17
Supplement: Supplementary file 2 [file f973f47e5df0ab8b88b9d2bb.docx]

**Supplementary Material S2: Measurement Variables and Definitions**

| **Type** | **Latent Variable** | **Measurement Variable** | **Question Items and Variable Assignment** |
| --- | --- | --- | --- |
| **Control Variables** | Demographic Characteristics | Gender | Female = 1, Male = 0 |
|  |  | Age | 1-3: 18-44 years, 45-64 years, ≥65 years |
|  |  | Education | 1-7: No formal education, Primary school, Middle school, High school, Secondary school, Junior college, Bachelor’s degree or above |
|  |  | Monthly household income | 1-7: <¥2,000, ¥2,000-3,000, ¥3,000-4,000, ¥4,000-5,000, ¥5,000-8,000, ¥8,000-10,000, ¥10,000-20,000. "Don’t know/No answer" = 4 |
|  |  | Insurance type | Dummy variables (0/1): Free medical care, Urban Employee Basic Medical Insurance (UEBMI), Urban-Rural Resident Basic Medical Insurance (URBMI) |
|  |  | More than one chronic disease | 1 = Multiple chronic diseases (≥2), 0 = Single chronic disease |
|  |  | Self-report health | 1-5: Excellent, Good, Average, Poor, Very poor |
|  |  | Travel time to primary care facilities（min) | 1-4: <10 minutes, 11-20 minutes, 21-30 minutes, >30 minutes |
| **Independent Variables** | Service Convenience | Registration waiting time | 1-4: >30 minutes, 20-30 minutes, 10-20 minutes, <10 minutes. "Don’t know/No answer" = 2.5 |
|  |  | Perceived waiting time | 1-4: Very long, Long, Moderate, Short. "Don’t know/No answer" = 2.5 |
|  | Service Effectiveness | Consultation feedback | Usefulness of consultation advice (4-point Likert scale): 1 = Not useful, 2 = Neutral, 3 = Somewhat useful, 4 = Very useful. "Don’t know/No answer" = 2.5 |
|  |  | Diagnostic and Treatment | Usefulness of diagnostic services (same as Consultation Feedback) |
|  |  | Demand satisfaction | Extent of meeting health needs (4-point Likert scale): 1 = Partially met, 2 = Mostly met, 3 = Fully met. "Don’t know/No answer" = 2.5 |
|  | Integrated Services | Scheduling appointment | Frequency of referral-based appointments (4-point Likert scale): Same as scheduling appointment |
|  |  | Reciprocal recognition | Frequency of mutual recognition of diagnostic results (4-point Likert scale): Same as scheduling appointment |
|  |  | Expert subsidence | Frequency of accessing specialist services at primary institutions (4-point Likert scale): Same as scheduling appointment |
|  | Government Subsidies | Subsidy intensity | Level of subsidy received (4-point Likert scale): 1 = None, 2 = Low, 3 = Moderate, 4 = High. "Don’t know/No answer" = 2.5 |
|  |  | Subsidy satisfaction | Satisfaction with subsidies (4-point Likert scale): 1 = Very dissatisfied, 2 = Dissatisfied, 3 = Satisfied, 4 = Very satisfied. "Don’t know/No answer" = 2.5 |
| **Primary outcome** | The utilization of primary health care | Selection of the medical institution | Frequency of choosing primary care when chronic condition changes (4-point Likert scale): Same as Home Visit Services. |

**Notes:**

- Likert scales use equidistant coding for "Don’t know/No answer" (2.5).
- Insurance type variables are mutually exclusive (0/1 dummy variables).
- All variables were measured using structured questionnaires.
